# Supplementary material for: Anhydrous solution synthesis of germanium nanocrystals from the germanium(ii) precursor Ge[N(SiMe3)2]2
Source: Royal Society of Chemistry journal article supplement (doi:10.1039/b416066e), 2005-01-01
Supplement: b416066e.pdf [file b416066e.pdf]

Electronic Supporting Information for *Chem. Commun.* B416066E

## Anhydrous Solution Synthesis of Germanium Nanocrystals from the Germanium (II) Precursor $\text{Ge}[\text{N}(\text{SiMe}_3)_2]_2$

Henry Gerung,<sup>a</sup> Scott D. Bunge,<sup>b</sup> Timothy J. Boyle,<sup>b\*</sup> C. Jeffrey Brinker<sup>a,b</sup> and Sang M. Han<sup>a</sup>

<sup>a</sup> Department of Chemical and Nuclear Engineering, University of New Mexico, 209 Farris Engineering Center, ALBUQUERQUE, NM 87131. Fax: 505-277-5433; Tel: 505-277-3118; E-mail: meister@unm.edu

<sup>b</sup> Advanced Materials Laboratory, Sandia National Laboratories, 1001 University Boulevard SE, ALBUQUERQUE, NM 87106. Fax: 505-272-7336; Tel: 505-272-7625; E-mail: tjboyle@sandia.gov

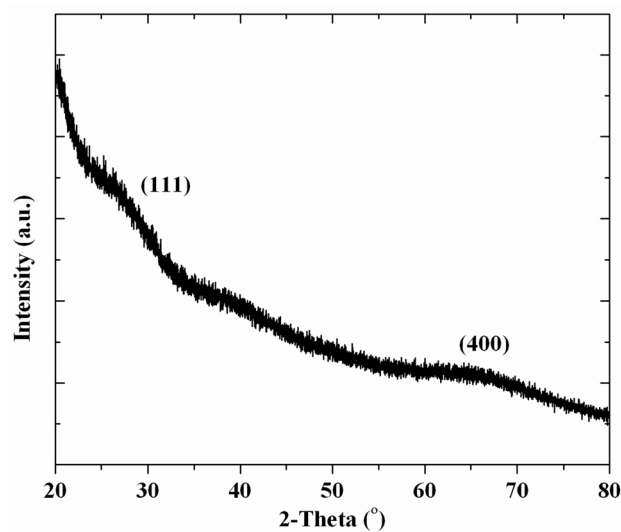

X-Ray diffraction spectrum of Ge NC powder. The diffraction peaks are diffuse due to the small particle size.
